# Supplementary material
Source: PubMed Central journal article supplement (PMC7773225)

### Plasmid Construct Map

LINC00844 was cloned in pLV-EF1a-MCS-IRES-Bsd by BamHI / NheI.

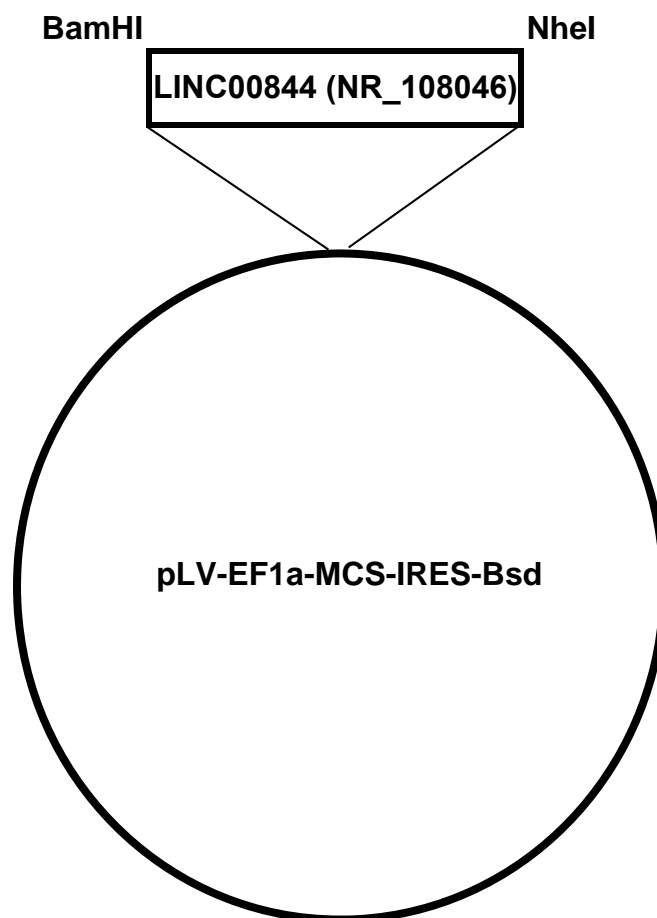

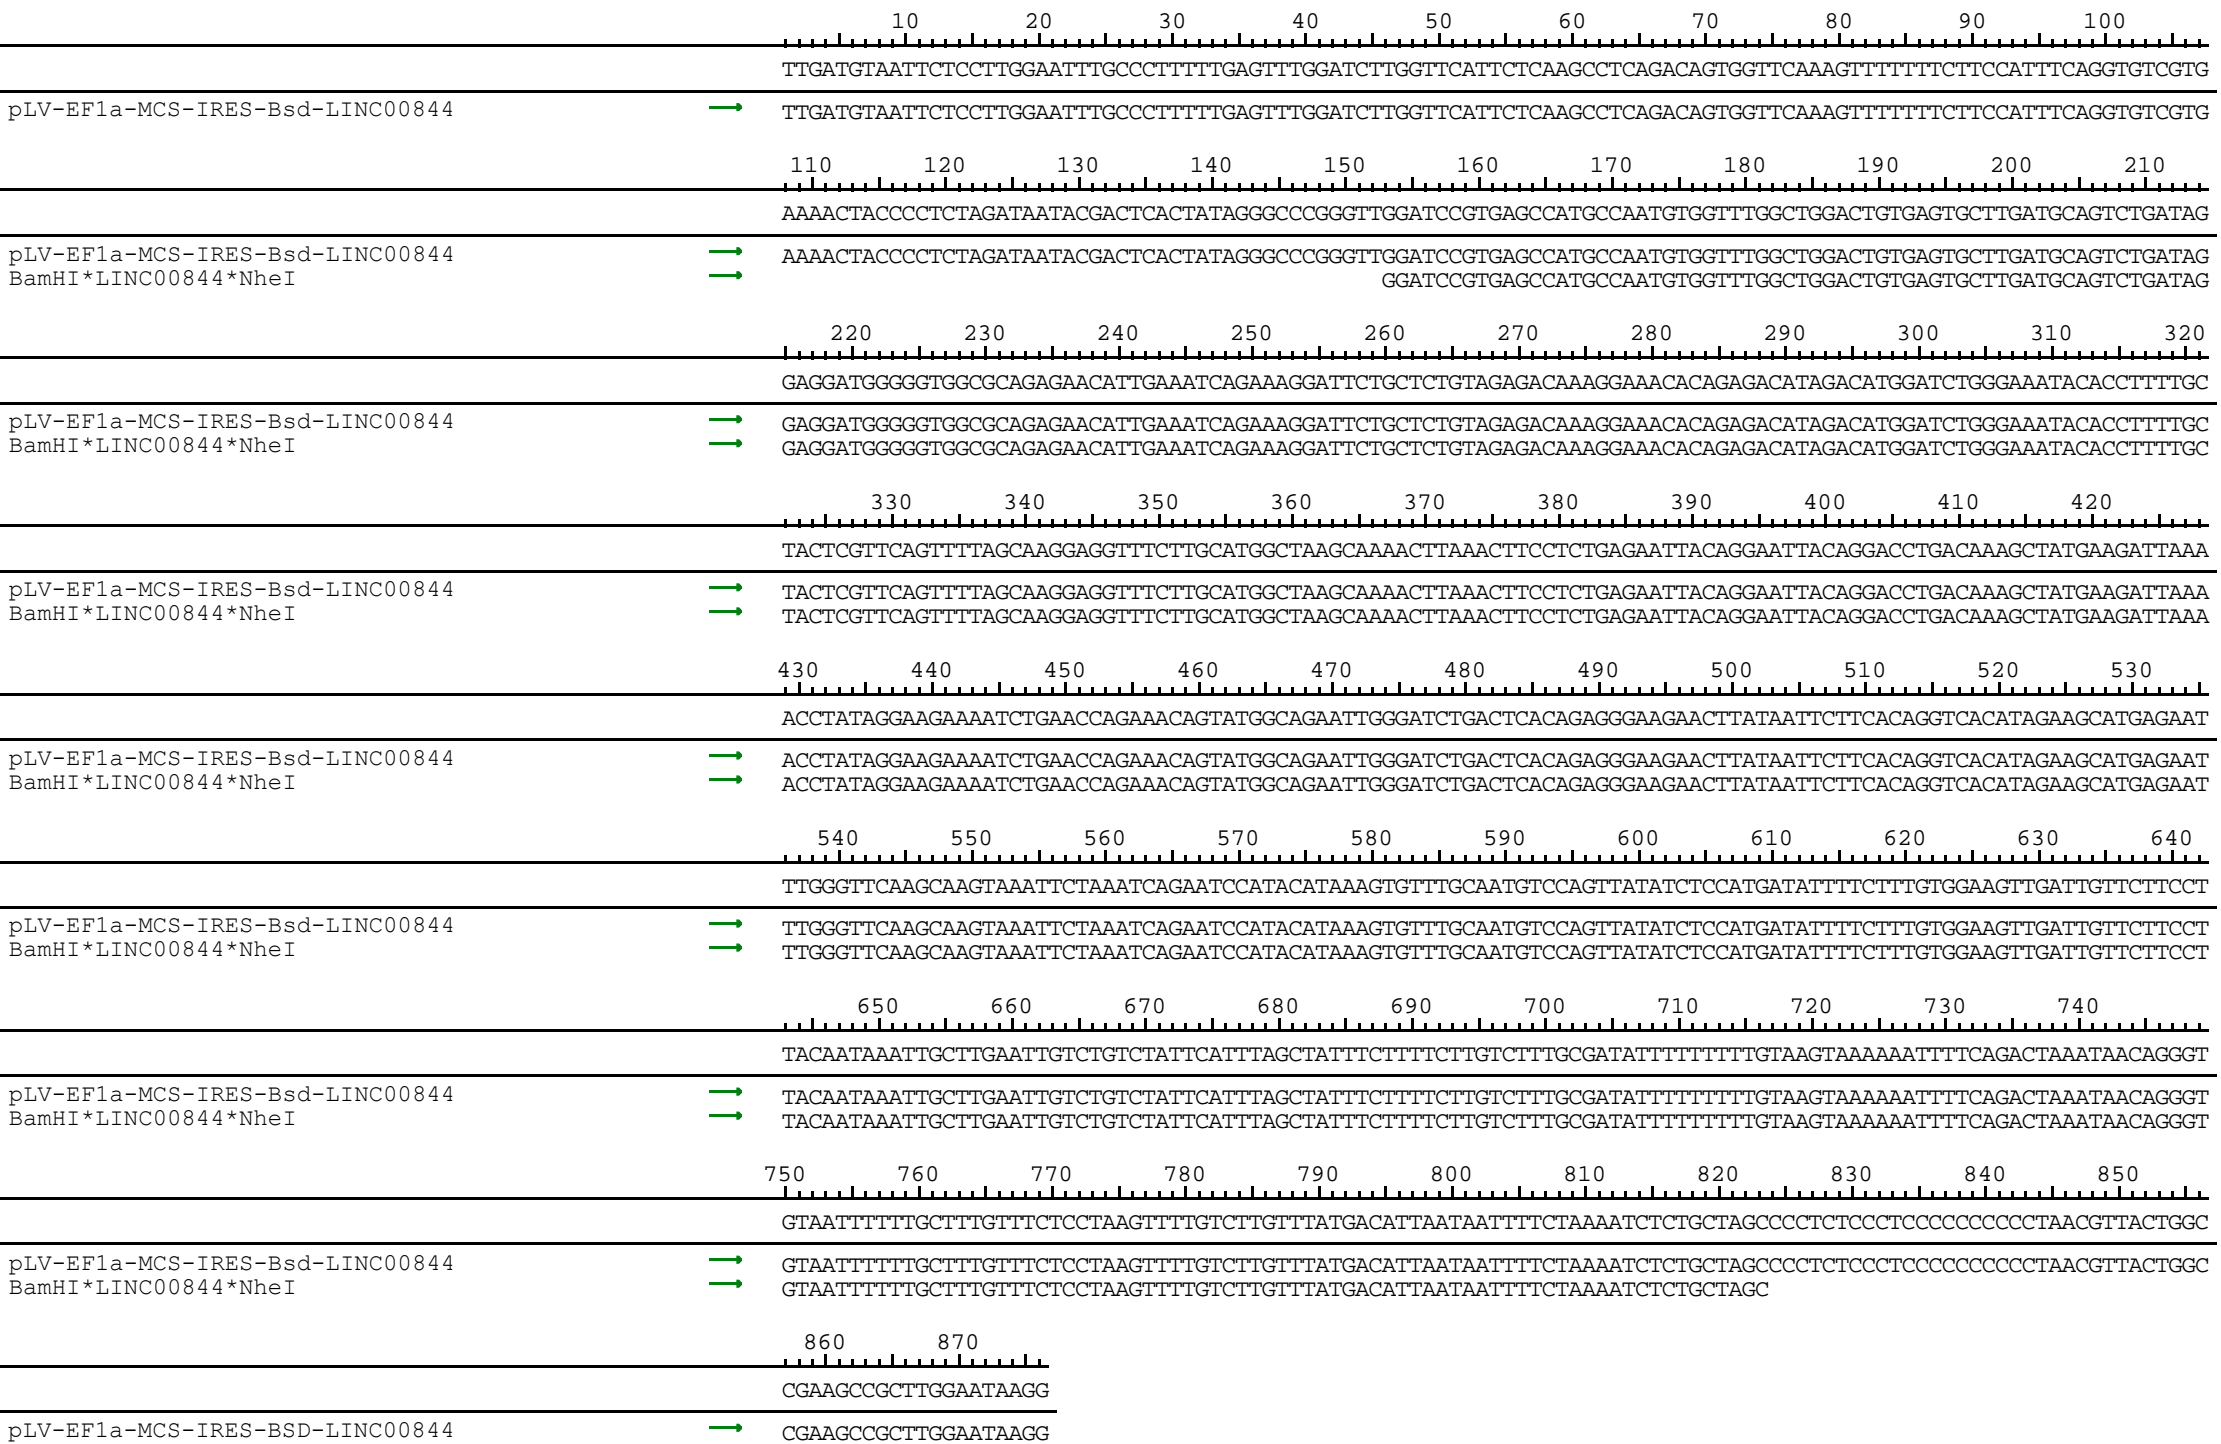

Supplement: NIHMS1655502-supplement-Li_et_al_ATOX_D-19-00939_Supplemental_Figures_pdf.pdf [file NIHMS1655502-supplement-Li_et_al_ATOX_D-19-00939_Supplemental_Figures_pdf.pdf]
